# Supplementary material for: Systemic Therapy and Its Surgical Implications in Patients with Resectable Liver Colorectal Cancer Metastases. A Report from the Western Canadian Gastrointestinal Cancer Consensus Conference
Source: MDPI journal article supplement (doi:10.3390/curroncol29030147), 2022-03-08
Supplement: s1 [file s1]

Supplementary Materials

# Systemic Therapy and Its Surgical Implications in Patients with Resectable Liver Colorectal Cancer Metastases. A Report from the Western Canadian Gastrointestinal Cancer Consensus Conference

Shahid Ahmed, Nicholas Bosma, Michael Moser, Shahida Ahmed, Bryan Brunet, Janine Davies, Corinne Doll, Dorie-Anna Dueck, Christina A. Kim, Shuying Ji, Duc Le, Richard Lee-Ying, Howard Lim, John Paul McGhie, Karen Mulder, Jason Park, Deepti Ravi, Daniel J. Renouf, Devin Schellenberg, Ralph P.W. Wong and Adnan Zaidi

**Table S1.** List of participants from the Western Canadian Gastrointestinal Cancers Group.

| Name                | Organization                       | Discipline            | Province |
|---------------------|------------------------------------|-----------------------|----------|
| Adnan Zaidi         | Saskatchewan Cancer Agency         | Medical Oncology      | SK       |
| Alec Watson         | Arnie Charbonneau Cancer Institute | Medical Oncology      | AB       |
| Anahita Dehmoobed   | CancerCare Manitoba                | Pharmacy              | MB       |
| Benjamin Goldenberg | CancerCare Manitoba                | Medical Oncology      | MB       |
| Bryan Brunet        | Saskatchewan Cancer Agency         | Radiation Oncology    | SK       |
| Chen Zhou           | University of British Columbia     | Pathology             | BC       |
| Christina Kim       | CancerCare Manitoba                | Medical Oncology      | MB       |
| Delia Sauciuc       | BC Cancer Agency                   | Medical Oncology      | BC       |
| Duc Le              | Saskatchewan Cancer Agency         | Radiation Oncology    | SK       |
| Edward Hardy        | BC Cancer Agency                   | Medical Oncology      | BC       |
| Elvira Planincic    | CancerCare Manitoba                | Nursing               | MB       |
| Georgia Geller      | BC Cancer Agency                   | Medical Oncology      | BC       |
| Haji Chalchal       | Saskatchewan Cancer Agency         | Medical Oncology      | SK       |
| Hatim Karachiwala   | Cross Cancer Institute             | Medical Oncology      | AB       |
| Howard Pai          | BC Cancer Agency                   | Radiation Oncology    | BC       |
| Jacob Easaw         | Cross Cancer Institute             | Medical Oncology      | AB       |
| James Paul          | CancerCare Manitoba                | Medical Oncology      | MB       |
| Janine Davies       | BC Cancer Agency                   | Medical Oncology      | BC       |
| Jennifer Rauw       | BC Cancer Agency                   | Medical Oncology      | BC       |
| Jennifer Spratlin   | Cross Cancer Institute             | Medical Oncology      | AB       |
| Jiti Gill           | BC Cancer Agency                   | Medical Oncology      | BC       |
| John Shaw           | University of Saskatchewan         | Hepatobiliary Surgery | SK       |
| Julie Price Hiller  | Cross Cancer Institute             | Medical Oncology      | AB       |
| Kamal Haider        | Saskatchewan Cancer Agency         | Medical Oncology      | SK       |
| Karen King          | Cross Cancer Institute             | Medical Oncology      | AB       |
| Karen Mulder        | Cross Cancer Institute             | Medical Oncology      | AB       |
| Kathi Klapp         | CancerCare Manitoba                | Nursing               | MB       |
| Keith Tankel        | Cross Cancer Institute             | Radiation Oncology    | AB       |
| Kelly Cheung        | CancerCare Manitoba                | Pharmacy              | MB       |
| Kimberley Johnson   | Alberta Health Services            | Nutrition             | AB       |
| Lyly Le             | BC Cancer Agency                   | Medical Oncology      | BC       |
| Nick Bosma          | BC Cancer Agency                   | Medical Oncology      | BC       |
| Mohamed Emara       | Saskatchewan Cancer Agency         | Oncology              | SK       |
| Muhammad Zulfiqar   | BC Cancer Agency                   | Medical Oncology      | BC       |
| Mussawar Iqbal      | Saskatchewan Cancer Agency         | Medical Oncology      | SK       |

|                  |                                    |                       |    |
|------------------|------------------------------------|-----------------------|----|
| Mike Moser       | University of Saskatchewan         | Hepatobiliary Surgery | SK |
| Patricia Tang    | Arnie Charbonneau Cancer Institute | Medical Oncology      | AB |
| Raida Khwaja     | University of Alberta              | Medical Oncology      | AB |
| Richard Lee Ying | Arnie Charbonneau Cancer Institute | Medical Oncology      | AB |
| Safiya Karim     | Arnie Charbonneau Cancer Institute | Medical Oncology      | AB |
| Sangjune Lee     | Arnie Charbonneau Cancer Institute | Radiation Oncology    | AB |
| Shahid Ahmed     | Saskatchewan Cancer Agency         | Medical Oncology      | SK |
| Sharlene Gill    | BC Cancer Agency                   | Medical Oncology      | BC |
| Shaun Loewen     | Arnie Charbonneau Cancer Institute | Radiation Oncology    | AB |
| Shazia Mahmood   | Saskatchewan Cancer Agency         | Radiation Oncology    | SK |
| Sheryl Koski     | Cross Cancer Institute             | Medical Oncology      | AB |
| Shuying Ji       | Shared Health Manitoba             | Pathology             | MB |
| Sunil Parimi     | BC Cancer Agency                   | Medical Oncology      | BC |
| Theresa Chan     | BC Cancer Agency                   | Medical Oncology      | BC |
| Tirath Nijjar    | Cross Cancer Institute             | Radiation Oncology    | AB |
| Vallerie Gordon  | CancerCare Manitoba                | Medical Oncology      | MB |
| Wei Xiong        | University of British Columbia     | Pathology             | BC |
| Will Jiang       | BC Cancer Agency                   | Radiation Oncology    | BC |

AB=Alberta, BC=British Columbia, MB=Manitoba, SK=Saskatchewan.

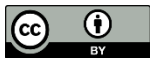

**Copyright:** © 2022 by the authors. Licensee MDPI, Basel, Switzerland. This article is an open access article distributed under the terms and conditions of the Creative Commons Attribution (CC BY) license (<https://creativecommons.org/licenses/by/4.0/>).
